# Supplementary material
Source: PubMed Central journal article supplement (PMC4870675)
Supplement: tx6b00076_si_001.pdf [file tx6b00076_si_001.pdf]

## **Supporting Information**

### **Perfluoroalkylated substances effects in *Xenopus laevis* A6 kidney epithelial cells determined by ATR-FTIR spectroscopy and chemometric analysis**

Eva Gorrochategui<sup>1</sup>, Sílvia Lacorte<sup>1</sup>, Romà Tauler<sup>1</sup> and Francis L. Martin<sup>2,3\*</sup>

<sup>1</sup>*Department of Environmental Chemistry, Institute of Environmental Assessment and Water Research (IDAEA), Consejo Superior de Investigaciones Científicas (CSIC), Barcelona, 08034, Catalonia, Spain;* <sup>2</sup>*Centre for Biophotonics, Lancaster Environment Centre, Lancaster University, Lancaster LA1 4YQ, UK;* <sup>3</sup>*School of Pharmacy and Biomedical Sciences, University of Central Lancashire, Preston, UK*

- Theory section
- Supplementary Figures
- Supplementary Table

## **Theory**

A brief description of the chemometric methods used in this study is below.

### ***Principal Component Analysis plus Linear Discriminant Analysis (PCA-LDA)***

PCA-LDA is a method that exploits the benefit of linear discriminant analysis (or canonical variants analysis, LDA), after using principal component analysis.<sup>1,2</sup>

On the one hand, the central idea of PCA is to reduce the dimensionality of a dataset consisting of large number of interrelated variables, using a small number of PCA factors [*i.e.*, principal components (PCs)] to retain as much as possible of the variation present in the original data set (> 95%).<sup>3</sup> On the other hand, LDA is a data separation technique, which explicitly attempts to model the differences between the classes of the data set that were assigned *a priori*. New variables [linear discriminants (LD)] are found such that the ratio of the between-cluster variance to the within-cluster variance is maximized, and thus the clusters are visualized at maximum separation. Therefore, LDA, like regression methods such as partial least squares, is a “supervised” method, that requires some previous knowledge of the samples constituents (*i.e.*, classes).

PCA can be applied before LDA (thus “PCA-LDA”) to reduce computational complexity, increase the recognition accuracy in different categories, and avoid LDA overfitting.<sup>4</sup>

### ***ANOVA-simultaneous component analysis (ASCA)***

The ASCA method can be understood as a direct generalization of the analysis of variance (ANOVA) for univariate data to the multivariate case.<sup>5,6</sup> Moreover, this method incorporates the information of the structure of datasets (*i.e.*, underlying factors such as time, dose or combinations thereof), enabling a better understanding of their biological information.

Thus, in ASCA, an ANOVA is initially performed on the raw data matrix, which is decomposed into the sum of different data matrices characterizing the variance caused by each one of the considered factors, plus a residual matrix containing the unexplained variance. The ANOVA equation valid for the three data sets of the present study, acquired following an experimental design of two factors (*i.e.*, chemical *-c-* and dose *-d-*) is shown in **Equation S1**:

$$\mathbf{X} = \mu + \alpha_c + \beta_d + \alpha\beta_{(cd)} + \mathbf{E} \quad (\text{S1})$$

where  $\mathbf{X}$  is a matrix containing the raw data acquired with the ATR-FTIR instrument,  $\mu$  represents an overall offset,  $\alpha_c$  represents the effect of the factor “chemical”,  $\beta_d$  represents the effect of the factor “dose”,  $\alpha\beta_{(cd)}$  represents the interaction of “chemical” and “dose” and  $\mathbf{E}$  is the residual matrix representing the natural variation among replicates. Thus, the performance of ANOVA allows the division of the variation of the distinct factors in orthogonal and independent parts, which is also one of the goals of the ASCA model.

Following ANOVA, a simultaneous component analysis (SCA) is applied individually to each of the ANOVA factor matrices. SCA is a generalization of PCA for the situation where the same variables have been measured in multiple conditions.

Thus, ASCA model combines the power of ANOVA to separate variance sources with the advantages of SCA to the modeling of the individual separate effect matrices. The mathematical basis of the resulting ASCA model for the dataset of the present study (*i.e.*, two-factor dataset) is shown in **Equation S2**:

$$\mathbf{X} = \mu + \mathbf{T}_c\mathbf{P}_c^T + \mathbf{T}_d\mathbf{P}_d^T + \mathbf{T}_{(cd)}\mathbf{P}_{(cd)}^T + \mathbf{E} \quad (\text{S2})$$

where component scores of each sub-model are given by the matrices indicated by  $\mathbf{T}_c$ ,  $\mathbf{T}_d$ ,  $\mathbf{T}_{(cd)}$ , and the component loadings are given by matrices  $\mathbf{P}_c$ ,  $\mathbf{P}_d$ ,  $\mathbf{P}_{(cd)}$ .  $\mathbf{E}$  is a matrix in which the residuals of all sub-models of the ASCA model are collected ( $\mathbf{E} = \mathbf{E}_c + \mathbf{E}_d +$

$\mathbf{E}_{(cd)}$ ). Thus, this equation means that the matrix  $\mathbf{X}$  is separated into contributions from the overall mean ( $\boldsymbol{\mu}$ ), one SCA model ( $\mathbf{T}_c\mathbf{P}_c^T$ ) describing the overall effect of the factor “chemical”, one SCA model ( $\mathbf{T}_d\mathbf{P}_d^T$ ) describing the overall effect of the factor “dose” and another SCA model ( $\mathbf{T}_{(cd)}\mathbf{P}_{(cd)}^T$ ) describing the interaction of “dose” with “chemical”. Hence, the ASCA model (**Equation S2**) is a direct multivariate generalization of the ANOVA model (**Equation S1**).

In order to examine the statistical significance of the effects of the investigated factors and their interaction, ASCA performs a permutation test in which the null hypothesis ( $\mathbf{H}_0$ ) assumes that there is no effect of the considered factor. However, such permutation test can only be performed under the assumption that raw data are well-balanced (*i.e.*, same number of observations for each factor level).

**Figure S1.** Visual effect of different pre-processing steps on a set of ATR-FTIR spectra, including feature selection, rubberband baseline correction, Amide I normalization, trained-mean centering and class definition.

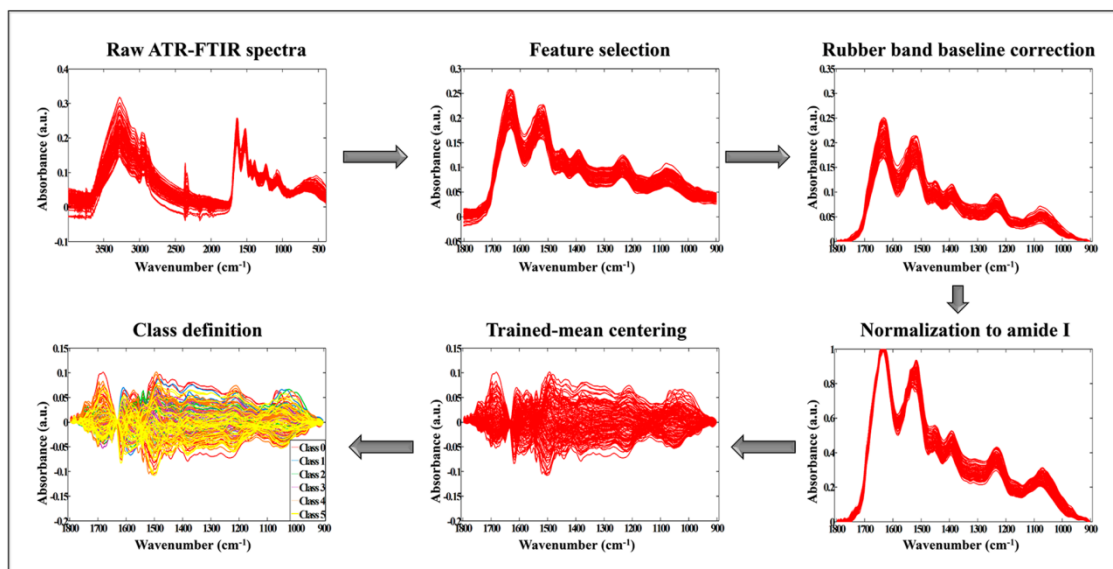

**Figure S2.** PCA-LDA loadings of PFBS, PFOA, PFOS and PFNA-treatments for the three experiments. Grey-shaded regions indicate spectral regions corresponding to particular biomolecular entities affected in all PFAS-treatments and thicker lines indicate PFAS-doses causing higher effects.

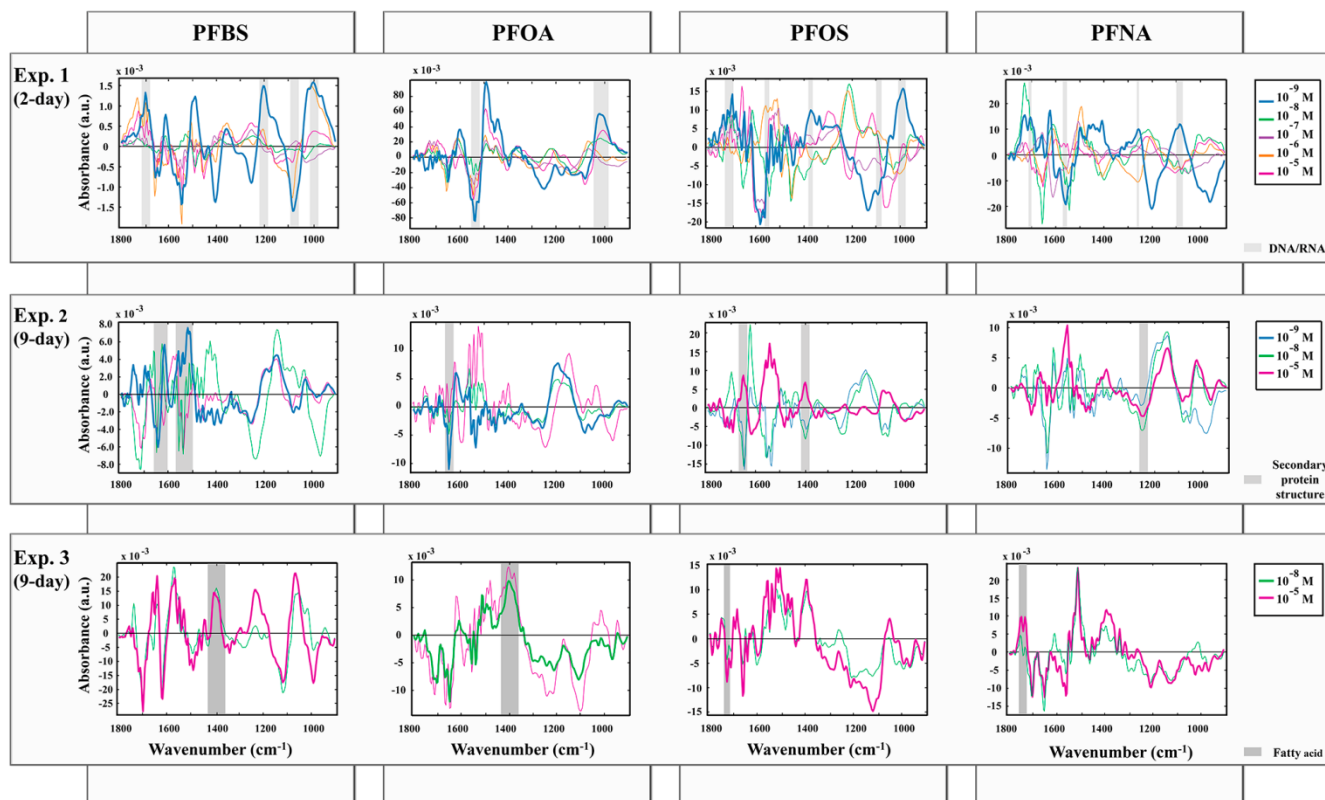

**Figure S3.** Structure of the data sets arranged for experiments 1, 2 and 3 to perform subsequent ASCA analyses. In the left part of the figures, each rectangle represents an ATR-FTIR spectrum, and the total of them is further arranged into a matrix, as indicated in the righthand side of the figures. In all cases, the following indices are used:  $w=1, \dots, W$  for the wavenumbers;  $d=1, \dots, D$  for the doses tested ( $d_1=0$  M,  $d_2=10^{-9}$  M,  $d_3=10^{-8}$  M,  $d_4=10^{-7}$  M,  $d_5=10^{-6}$  M and  $d_6=10^{-5}$  M);  $c=1, \dots, C$  for the chemicals tested ( $c_1=$  PFBS,  $c_2=$  PFOS,  $c_3=$  PFOA and  $c_4=$  PFNA); and,  $i=1, \dots, I$  for the number of replicates of each category.

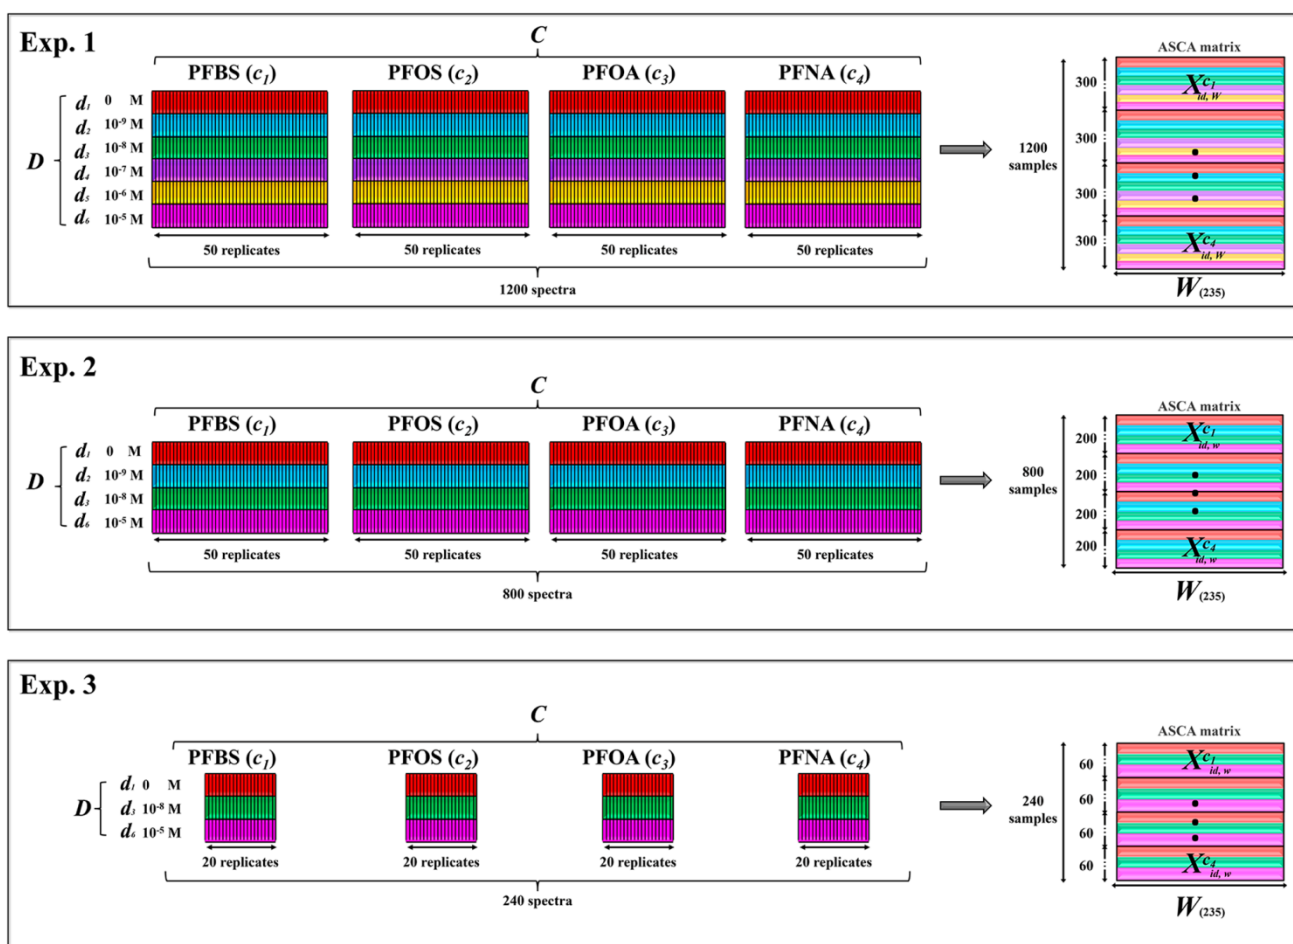

**Table S1.** Principal segregating wavenumbers and associated biomolecular entities<sup>7</sup> derived from cluster vectors plots of **PCA-LDA**. The indicated wavenumbers (ranked from higher to lower priority) are shown for the distinct experiments and chemicals (*i.e.*, PFBS, PFOS, PFOA and PFNA) at the dose presenting highest effects. Grey-shaded rows indicate spectral bands associated to particular entities affected by all chemicals: DNA/RNA (light grey, exp. 1), secondary protein structures (medium grey, exp. 2) and fatty acids (dark grey, exp. 3).

| Exp. | Chemical treatment | Dose of highest effects | Wavenumber (cm <sup>-1</sup> ) | Biological fingerprint                                                                        |
|------|--------------------|-------------------------|--------------------------------|-----------------------------------------------------------------------------------------------|
| 1    | PFBS               | 10 <sup>-9</sup> M      | 1080                           | Stretching PO <sub>2</sub> <sup>-</sup> symmetric vibrations                                  |
|      |                    |                         | 994                            | C-O ribose, C-C                                                                               |
|      |                    |                         | 1201                           | PO <sub>2</sub> <sup>-</sup> asymmetric (phosphate I)                                         |
|      |                    |                         | 1403                           | Symmetric CH <sub>3</sub> bending modes of the methyl groups of proteins                      |
|      |                    |                         | 1549                           | Amide II                                                                                      |
|      |                    |                         | 1698/9                         | C <sub>2</sub> =O guanine/ N-H thymine                                                        |
|      | PFOS               | 10 <sup>-9</sup> M      | 1489                           | In-plane CH bending vibration                                                                 |
|      |                    |                         | 1581                           | Ring C-C stretching of phenyl                                                                 |
|      |                    |                         | 1567                           | Ring base                                                                                     |
|      |                    |                         | 1137                           | Oligosaccharide C-OH stretching band                                                          |
|      |                    |                         | 996                            | C-O ribose, C-C                                                                               |
|      |                    |                         | 1698/9                         | C <sub>2</sub> =O guanine/ N-H thymine                                                        |
|      |                    |                         | 1095                           | Stretching PO <sub>2</sub> <sup>-</sup> symmetric vibrations                                  |
|      |                    |                         | 1717                           | C=O thymine; C=O stretching vibration of DNA and RNA; C=O stretching vibration of purine base |
|      |                    |                         | 1373                           | Stretching C-N cytosine, guanine                                                              |
|      |                    |                         | 1736                           | C=O stretching (lipids)                                                                       |
|      | PFOA               | 10 <sup>-9</sup> M      | 1494                           | In-plane CH bending vibration                                                                 |
|      |                    |                         | 1543                           | Amide II                                                                                      |
|      |                    |                         | 1020                           | DNA                                                                                           |
|      |                    |                         | 1524                           | Stretching C=N, C=C                                                                           |
|      |                    |                         | 1555                           | Ring base                                                                                     |
|      |                    |                         | 1444                           | δ(CH <sub>2</sub> ), lipids, fatty acids                                                      |
|      | PFNA               | 10 <sup>-9</sup> M      | 1250                           | Amide III                                                                                     |
|      |                    |                         | 1204                           | Vibrational modes of collagen proteins- Amide III                                             |
|      |                    |                         | 1558                           | Ring base                                                                                     |
|      |                    |                         | 1624                           | Unassigned band                                                                               |
|      |                    |                         | 1728                           | C=O band                                                                                      |
|      |                    |                         | 1089                           | Stretching PO <sub>2</sub> <sup>-</sup> symmetric in RNA                                      |
| 1705 |                    |                         | C=O thymine                    |                                                                                               |
| 1408 |                    |                         | Unassigned band                |                                                                                               |



|   |      |                                                                                   |      |                                                                                                                                                               |
|---|------|-----------------------------------------------------------------------------------|------|---------------------------------------------------------------------------------------------------------------------------------------------------------------|
|   |      |                                                                                   | 1258 | PO <sub>2</sub> <sup>-</sup> asymmetric (phosphate I)                                                                                                         |
| 2 | PFBS | 10 <sup>-9</sup> M                                                                | 1517 | Amide II                                                                                                                                                      |
|   |      |                                                                                   | 1510 | In-plane CH bending vibration from the phenyl rings                                                                                                           |
|   |      |                                                                                   | 1616 | Ring C-C stretching of phenyl                                                                                                                                 |
|   |      |                                                                                   | 1643 | Amide I band (arises from C=O stretching vibrations)                                                                                                          |
|   |      |                                                                                   | 1559 | Ring base                                                                                                                                                     |
|   |      |                                                                                   | 1540 | Protein Amide II absorption-predominately β-sheet of Amide II                                                                                                 |
|   | PFOS | 10 <sup>-5</sup> M                                                                | 1750 | ν(C=C) lipids, fatty acids                                                                                                                                    |
|   |      |                                                                                   | 1543 | Amide II                                                                                                                                                      |
|   |      |                                                                                   | 1524 | Stretching C=N, C=C                                                                                                                                           |
|   |      |                                                                                   | 1559 | Ring base                                                                                                                                                     |
|   |      |                                                                                   | 1652 | Amide I                                                                                                                                                       |
|   |      |                                                                                   | 1396 | Symmetric CH <sub>3</sub> bending of the methyl groups of proteins                                                                                            |
|   |      |                                                                                   | 1620 | Peak of nucleic acids due to the base carbonyl stretching and ring breathing mode                                                                             |
|   |      |                                                                                   | PFOA | 10 <sup>-9</sup> M                                                                                                                                            |
|   | 1192 | Unassigned band                                                                   |      |                                                                                                                                                               |
|   | 1535 | Stretching C=N, C=C                                                               |      |                                                                                                                                                               |
|   | 1620 | Peak of nucleic acids due to the base carbonyl stretching and ring breathing mode |      |                                                                                                                                                               |
|   | PFNA | 10 <sup>-5</sup> M                                                                |      |                                                                                                                                                               |
|   |      |                                                                                   | 1146 | Phosphate and oligosaccharides                                                                                                                                |
|   |      |                                                                                   | 1026 | Carbohydrates peak for solutions; vibrational frequency of CH <sub>2</sub> OH groups of carbohydrates (including glucose, fructose, glycogen, etc.); glycogen |
|   |      |                                                                                   | 1254 | Amide III                                                                                                                                                     |
|   |      |                                                                                   | 1400 | Symmetric stretching vibration of COO <sup>-</sup> group of fatty acids and amino acids                                                                       |
|   |      |                                                                                   | 1713 | C=O thymine                                                                                                                                                   |
| 3 |      |                                                                                   | PFBS | 10 <sup>-5</sup> M                                                                                                                                            |
|   | 1620 | Peak of nucleic acids due to the base carbonyl stretching and ring breathing mode |      |                                                                                                                                                               |
|   | 1068 | Stretching C-O ribose                                                             |      |                                                                                                                                                               |
|   | 1639 | Amide I                                                                           |      |                                                                                                                                                               |
|   | 1567 | Ring base                                                                         |      |                                                                                                                                                               |
|   | 994  | C-O ribose, C-C                                                                   |      |                                                                                                                                                               |
|   | 1119 | Symmetric stretching P-O-C; C-O stretching mode                                   |      |                                                                                                                                                               |
|   | 1234 | Composed of Amide III and phosphate vibration of nucleic acids                    |      |                                                                                                                                                               |

|             |                                                            |      |                                                                                         |
|-------------|------------------------------------------------------------|------|-----------------------------------------------------------------------------------------|
| <b>PFOS</b> | <b>10<sup>-5</sup> M</b>                                   | 1400 | Symmetric stretching vibration of COO <sup>-</sup> group of fatty acids and amino acids |
|             |                                                            | 1119 | Symmetric stretching P-O-C; C-O stretching mode                                         |
|             |                                                            | 1504 | In-plane CH bending from the phenyl rings                                               |
|             |                                                            | 1517 | Amide II                                                                                |
|             |                                                            | 1396 | Symmetric CH <sub>3</sub> bending of the methyl groups of proteins                      |
|             |                                                            | 1659 | Amide I                                                                                 |
|             |                                                            | 1559 | Ring base                                                                               |
|             |                                                            | 1539 | Protein Amide II absorption-predominately β-sheet of Amide II                           |
| <b>PFOA</b> | <b>10<sup>-8</sup> M</b>                                   | 1724 | C=O stretching band mode of the fatty acid ester                                        |
|             |                                                            | 1400 | Symmetric stretching vibration of COO <sup>-</sup> group of fatty acids and amino acids |
|             |                                                            | 1647 | Amide I in normal tissues- for cancer is in lower frequencies                           |
| <b>PFNA</b> | <b>10<sup>-5</sup> M</b>                                   | 1512 | In-plane CH bending vibration from the phenyl rings                                     |
|             |                                                            | 1113 | Symmetric stretching P-O-C                                                              |
|             |                                                            | 1512 | In-plane CH bending vibration from the phenyl rings                                     |
|             |                                                            | 1701 | C=O guanine                                                                             |
|             |                                                            | 1651 | Amide I                                                                                 |
|             |                                                            | 1562 | Unassigned band                                                                         |
|             |                                                            | 1393 | Unassigned band                                                                         |
|             |                                                            | 1528 | C=N guanine                                                                             |
|             |                                                            | 1748 | ν(C=C) lipids, fatty acids                                                              |
| 1732        | Absorption band of fatty acid ester; Fatty acid ester band |      |                                                                                         |

## References

- (1) Fearn, T. (2002) Discriminant analysis, in *Handbook of Vibrational Spectroscopy* (Griffiths, J. M. C. and P. R., Ed.), pp 2086–2093. New York.
- (2) Walsh, M. J., Singh, M. N., Pollock, H. M., Cooper, L. J., German, M. J., Stringfellow, H. F., Fullwood, N. J., Paraskevaidis, E., Martin-Hirsch, P. L., and Martin, F. L. (2007) ATR microspectroscopy with multivariate analysis segregates grades of exfoliative cervical cytology. *Biochem. Biophys. Res. Commun.* 352, 213–219.
- (3) Llabjani, V., Jones, K. C., Thomas, G. O., Walker, L. A., Shore, R. F., and Martin, F. L. (2009) Polybrominated diphenyl ether-associated alterations in cell biochemistry as determined by attenuated total reflection Fourier-transform infrared spectroscopy: a comparison with DNA-reactive and/or endocrine-disrupting agents. *Environ. Sci. Technol.* 43, 3356-3364.
- (4) Llabjani, V., Trevisan, J., Jones, K. C., Shore, R. F., and Martin, F. L. (2010) Binary mixture effects by PBDE congeners (47, 153, 183, or 209) and PCB congeners (126 or 153) in MCF-7 cells: biochemical alterations assessed by IR spectroscopy and multivariate analysis. *Environ. Sci. Technol.* 44, 3992–3998.
- (5) Smilde, A. K., Jansen, J. J., Hoefsloot, H. C. J., Lamers, R.-J. A. N., van der Greef, J., and Timmerman, M. E. (2005) ANOVA-simultaneous component analysis (ASCA): a new tool for analyzing designed metabolomics data. *Bioinformatics* 21, 3043–3048.
- (6) Farrés, M., Villagrasa, M., Eljarrat, E., Barceló, D., and Tauler, R. (2012) Chemometric evaluation of different experimental conditions on wheat (*Triticum aestivum* L.) development using liquid chromatography mass spectrometry (LC-MS) profiles of benzoxazinone derivatives. *Anal. Chim. Acta* 731, 24–31.
- (7) Movasaghi, Z., Rehman, S., and ur Rehman, D. I. (2008) Fourier transform infrared (FTIR) spectroscopy of biological tissues. *Appl. Spectrosc. Rev.* 43, 134–179.
